# Supplementary material
Source: HighWire-hosted journal article supplement (https://cmaj.ca/highwire/filestream/79843/field_highwire_adjunct_files/2/210131-res-3-at.pdf)
Supplement: 210131-res-3-at.pdf [file 210131-res-3-at.pdf]

### Appendix 3: Socio-demographic information of the brokers

| N                                                       | Gender | Expertise (years) | Community served                      | Supplemental specialty area of focus               |
|---------------------------------------------------------|--------|-------------------|---------------------------------------|----------------------------------------------------|
| <b>Family-based holistic cultural brokers</b>           |        |                   |                                       |                                                    |
| 1                                                       | Male   | 20                | Somali                                | Senior outreach                                    |
| 2                                                       | Male   | 15                | South Sudanese                        | Senior outreach                                    |
| 3                                                       | Male   | 2                 | Syrian, Iraqi, Kurdish                | Senior outreach                                    |
| 4                                                       | Female | 15                | South Asian, Indian, Pakistani        | Children services, maternal care                   |
| 5                                                       | Female | 20                | Chinese (Cantonese, Mandarin)         | Children services, maternal care                   |
| 6                                                       | Female | 5                 | Chinese (Mandarin)                    | Children services                                  |
| 7                                                       | Female | 15                | Middle Eastern                        | Children services, maternal care                   |
| 8                                                       | Female | 5                 | Filipino                              | Children services, maternal care                   |
| 9                                                       | Female | 10                | Filipino                              | Children services, maternal care                   |
| 10                                                      | Female | 10                | French-speaking African               | Children services, maternal care                   |
| 11                                                      | Female | 10                | Nigerian and English-speaking African | Family wellness                                    |
| 12                                                      | Female | 10                | Syrian, Iraqi, Kurdish                | Family wellness                                    |
| 13                                                      | Female | 10                | Somali                                | Children services, maternal care                   |
| 14                                                      | Female | 5                 | Spanish-speaking and Indonesian       | Family wellness                                    |
| 15                                                      | Male   | 20                | Bhutanese and Nepalese                | Children services, maternal care                   |
| 16                                                      | Male   | 5                 | Ethiopian and Eritrean                | Youth support                                      |
| <b>MCHB organizational practice and program support</b> |        |                   |                                       |                                                    |
| 17                                                      | Female | 20                | All communities                       | Inner City and Provincial Government               |
| 18                                                      | Female | 20                | All communities                       | Immigrant-serving and English Learning Sector      |
| 19                                                      | Female | 20                | All communities                       | Child Welfare Sector                               |
| 20                                                      | Female | 20                | All communities                       | Perinatal health, youth work, community organizing |
| 21                                                      | Female | 20                | All communities                       | Immigrant-serving sector and intersectional work   |
